# Supplementary material for: Cadmium toxicity on communities of ammonia-oxidizing microorganisms
Source: PeerJ. 2025 Feb 21;13:e18829. doi: 10.7717/peerj.18829 (PMC11849506; doi:10.7717/peerj.18829)
Supplement: Supplemental Information 3 [file peerj-13-18829-s003.xlsx]

## Sheet: Fig 1 raw data
		incubation days
Cd concentration (mg/kg soil)	repeat	1 day	7 day	14 day	28 day
0	1	0.562617	0.440087	0.482635	0.447757
0	2	0.637122	0.520983	0.484643	0.485922
0	3	0.648809	0.516278	0.496696	0.482452
0.5	1	0.622513	0.482565	0.456522	0.468391
0.5	2	0.530843	0.40247	0.396443	0.469304
0.5	3	0.585626	0.482452	0.475696	0.422374
1	1	0.70067	0.475078	0.457435	0.413496
1	2	0.718748	0.449035	0.475696	0.424748
1	3	0.768026	0.404113	0.404113	0.413974
5	1	0.478923	0.401374	0.37953	0.380009
5	2	0.452504	0.421461	0.441913	0.389322
5	3	0.468026	0.417078	0.406852	0.440452
10	1	0.371748	0.263504	0.259626	0.285922
10	2	0.378923	0.310435	0.316661	0.322452
10	3	0.312504	0.314087	0.322191	0.31187
