# Supplementary material for: Cadmium toxicity on communities of ammonia-oxidizing microorganisms
Source: PeerJ. 2025 Feb 21;13:e18829. doi: 10.7717/peerj.18829 (PMC11849506; doi:10.7717/peerj.18829)
Supplement: Supplemental Information 4 [file peerj-13-18829-s004.xlsx]

## Sheet: Fig.2 raw data
	Relative Respones		incubation days
	Cd concentration (mg/kg soil)	repeat	1 day	7 day	14 day	28 day
	0	1	91.3069	89.367	98.9024	94.855
	0	2	103.398	105.794	99.314	102.94
	0	3	105.295	104.839	101.784	102.205
	0.5	1	101.027	97.9929	93.5513	99.2264
	0.5	2	86.1503	81.7282	81.2399	99.4198
	0.5	3	95.0409	97.97	97.4804	89.4779
	1	1	113.711	96.4726	93.7384	87.597
	1	2	116.645	91.184	97.4804	89.9808
	1	3	124.643	82.0619	82.8116	87.6984
	5	1	77.7242	81.5057	77.7741	80.503
	5	2	73.4367	85.5847	90.5576	82.4759
	5	3	75.9557	84.6947	83.3729	93.3076
	10	1	60.3308	53.509	53.203	60.5711
	10	2	61.4953	63.039	64.8907	68.3099
	10	3	50.7162	63.7806	66.024	66.068
