# Supplementary material for: Cadmium toxicity on communities of ammonia-oxidizing microorganisms
Source: PeerJ. 2025 Feb 21;13:e18829. doi: 10.7717/peerj.18829 (PMC11849506; doi:10.7717/peerj.18829)
Supplement: Supplemental Information 5 [file peerj-13-18829-s005.xlsx]

## Sheet: Fig3 raw data
AOA						AOB
incubation days	Cd (mg/kg soil)	lgAOA				incubation days	Cd (mg/kg soil)	lgAOA
1	0	11.0753				1	0	11.4428
1	0	11.8337				1	0	10.1513
1	0	12.2112				1	0	9.16873
1	1	21.0151				1	1	10.0167
1	1	20.1817				1	1	9.71459
1	1	19.1216				1	1	9.33581
1	10	12.622				1	10	16.8509
1	10	10.3493				1	10	12.535
1	10	8.07837				1	10	8.28847
7	0	21.1357				7	0	10.1332
7	0	19.6205				7	0	8.99593
7	0	17.5764				7	0	8.31411
7	1	19.637				7	1	11.3595
7	1	19.0319				7	1	10.2989
7	1	18.5759				7	1	9.24014
7	10	16.6218				7	10	13.4215
7	10	16.0176				7	10	11.8347
7	10	15.6379				7	10	10.0913
28	0	9.75533				28	0	9.4301
28	0	9.14973				28	0	8.90117
28	0	8.2411				28	0	8.06647
28	1	5.53076				28	1	18.6174
28	1	5.30349				28	1	16.571
28	1	4.84894				28	1	13.7629
28	10	12.5922				28	10	9.08702
28	10	9.41271				28	10	8.40428
28	10	7.06239				28	10	7.79777
