# Supplementary material for: Cadmium toxicity on communities of ammonia-oxidizing microorganisms
Source: PeerJ. 2025 Feb 21;13:e18829. doi: 10.7717/peerj.18829 (PMC11849506; doi:10.7717/peerj.18829)
Supplement: Supplemental Information 6 [file peerj-13-18829-s006.xlsx]

## Sheet: Figure 4 raw data
AOA					AOB
incubation days	Cd (mg/kg soil)	lgAOA	PNR		incubation days	Cd (mg/kg soil)	lgAOB	PNR
1	0	11.0753	0.562617		1	0	11.4428	0.562617
1	0	11.8337	0.637122		1	0	10.1513	0.637122
1	0	12.2112	0.648809		1	0	9.16873	0.648809
1	1	21.0151	0.70067		1	1	10.0167	0.70067
1	1	20.1817	0.718748		1	1	9.71459	0.718748
1	1	21.673	0.768026		1	1	9.33581	0.768026
1	10	12.622	0.371748		1	10	16.8509	0.371748
1	10	8.33	0.378923		1	10	12.535	0.378923
1	10	8.07837	0.312504		1	10	8.28847	0.312504
7	0	21.1357	0.440087		7	0	10.1332	0.440087
7	0	19.6205	0.520983		7	0	8.99593	0.520983
7	0	17.5764	0.516278		7	0	8.31411	0.516278
7	1	19.637	0.475078		7	1	11.3595	0.475078
7	1	19.0319	0.449035		7	1	10.2989	0.449035
7	1	18.5759	0.404113		7	1	9.24014	0.404113
7	10	16.6218	0.263504		7	10	13.4215	0.263504
7	10	16.0176	0.310435		7	10	11.8347	0.310435
7	10	15.6379	0.314087		7	10	10.0913	0.314087
28	0	9.75533	0.447757		28	0	9.4301	0.447757
28	0	9.14973	0.485922		28	0	8.90117	0.485922
28	0	8.2411	0.482452		28	0	8.06647	0.482452
28	1	5.53076	0.413496		28	1	18.6174	0.413496
28	1	5.30349	0.424748		28	1	16.571	0.424748
28	1	4.84894	0.413974		28	1	13.7629	0.413974
28	10	10.33	0.285922		28	10	9.08702	0.285922
28	10	9.934	0.322452		28	10	8.40428	0.322452
28	10	7.06239	0.31187		28	10	7.79777	0.31187
